# Supplementary material for: Late-life dietary folate restriction reduces biosynthetic processes without compromising healthspan in mice
Source: PubMed Central journal article supplement (PMC10802571; doi:10.1101/2024.01.12.575290), 2024-01-12

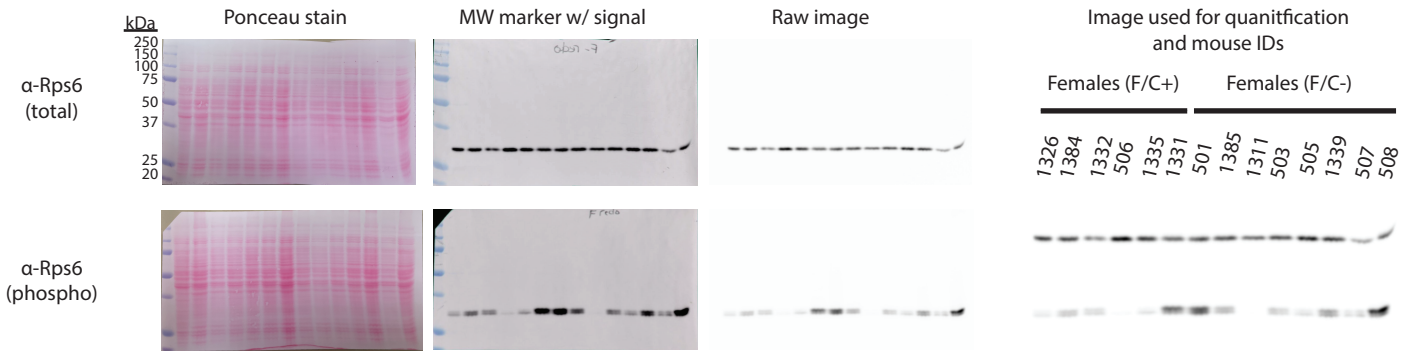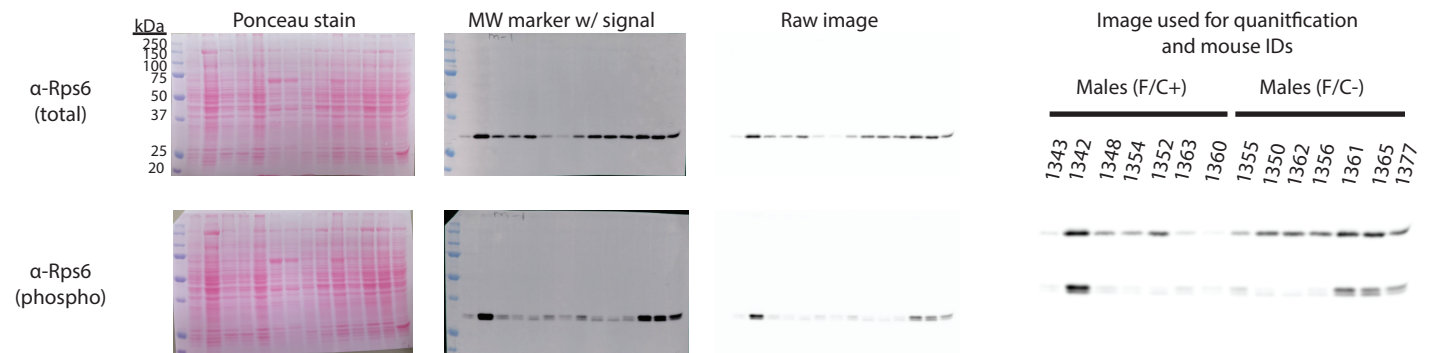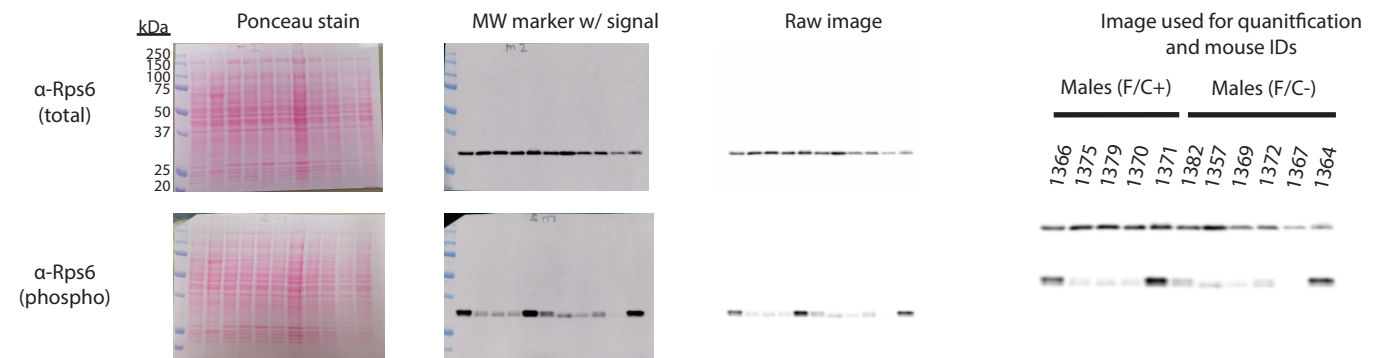

Supplement: media-2.pdf [file media-2.pdf]
